# Supplementary material for: Planning for the Maintenance of Floristic Diversity in the Face of Land Cover and Climate Change
Source: Springer Nature journal article supplement (doi:10.1007/s00267-017-0829-0), 2017-02-03
Supplement: MOESM3 [file 12045252]

**Supplementary Information 2: β-diversity values for KwaZulu-Natal (KZN) and their discount values**

Planning for the maintenance of floristic diversity in the face of land cover and climate change

Environmental Management

Debbie Jewitt1,2 (Corresponding author), Peter S. Goodman2, Barend F.N. Erasmus3, Timothy G. O’Connor4, Ed T.F. Witkowski2

Email: [Debbie.Jewitt@kznwildlife.com](mailto:Debbie.Jewitt@kznwildlife.com)

1Biodiversity Research and Assessment, Ezemvelo KZN Wildlife, P.O. Box 13053, Cascades, 3202, South Africa

2School of Animal, Plant and Environmental Sciences, University of the Witwatersrand, Johannesburg, Private Bag X3, WITS, 2050, South Africa

3Global Change and Sustainability Research Institute, University of the Witwatersrand, Johannesburg, Private Bag X3, WITS, 2050, South Africa

4South African Environmental Observation Network, P.O. Box 2600, Pretoria, 0001, South Africa


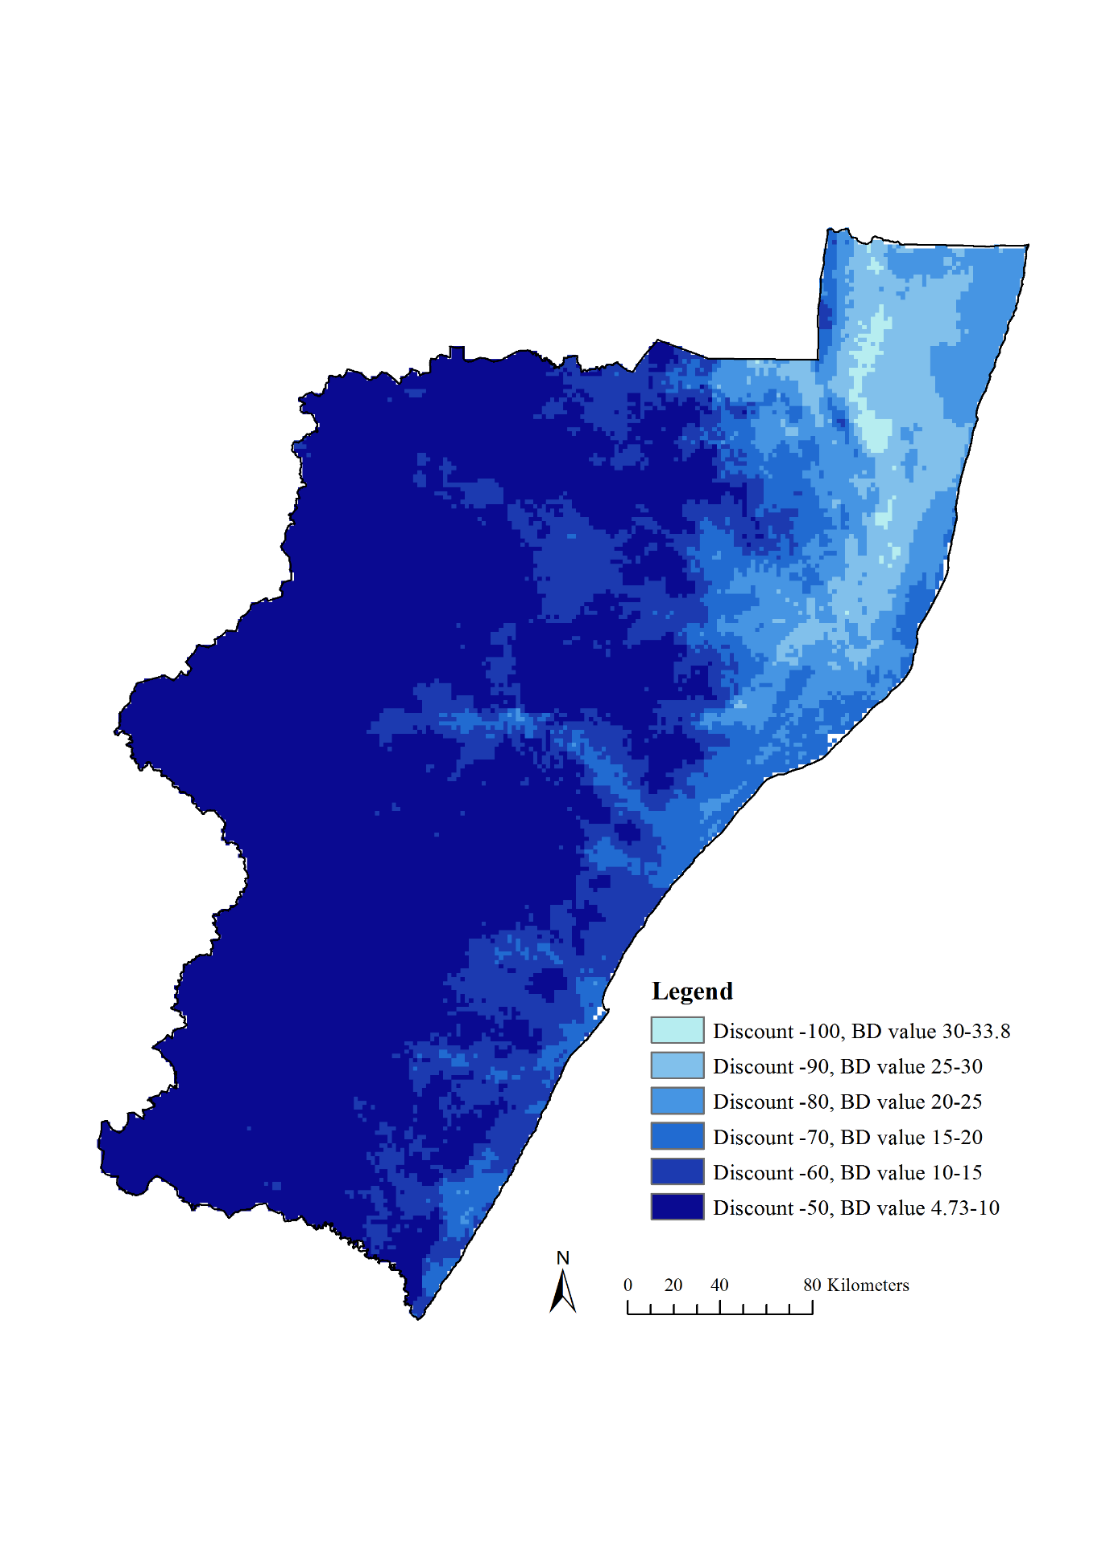


**Fig. 3** Beta diversity values for KwaZulu-Natal (KZN) and their discount values (modified from Jewitt et al 2016).

**Reference**

Jewitt D, Goodman PS, O’Connor TG, Erasmus BFN, Witkowski ETF (2016) Mapping landscape beta diversity of plants across KwaZulu-Natal, South Africa, for aiding conservation planning. Biodivers Conserv 25:2641-2654
